# Supplementary material
Source: publisher site journal article supplement (https://www.dovepress.com/article/182525)
Supplement: Supplementary file 1 [file get_supplementary_file.php]

Supplementary Table 1 Predicted target genes of miR4792 by three predicted analysis tools online

| RPL10 | ICOSLG | GALNT2 | LMNB2 |
| --- | --- | --- | --- |
| IGF1R | GPR75 | GAN | NACC2 |
| FOXC1 | CPA4 | ELK1 | NFIC |
| AKIRIN1 | COX15 | ANKFY1 | NLGN2 |
| COX6A1 | CLSPN | ZDBF2 | POLL |
| GRPEL2 | BPTF | SERINC1 | RAD51 |
| SLC9A8 | ASB6 | EMC1 | SCN4B |
| C16orf87 | ZBTB46 | CDKN2B | SETD7 |
| TG | SYN3 | CENPM | SPRYD3 |
| PGAM5 | TMEM94 | CFAP77 | TNFAIP1 |
| SAA1 | SRM | TBC1D13 | TOMM40 |
| GABRR2 | ZNF860 | ATXN1L | TSPAN31 |
| KIAA1644 | TET3 | CD226 | TTLL12 |
| MORF4L2 | RUNX1 | CRABP2 | ZC3H7B |
| RNF185 | SPARC | EPN2 | ZNF609 |
| RRM1 | PVR | FBXL18 | CARD6 |
| ACSBG1 | SNAP47 | FGFR1 | GLP2R |
| NEDD4L | RAB3D | HDAC5 | OR2A4 |
| GSR | PEX11B | HIC2 | RNF11 |
| STX6 | FANCF | HS6ST1 | RPL24 |
| RAB40C | PIGP | GALNT2 | SLC27A4 |
| NME2 | C12orf49 | GAN | ZNF347 |
| RPL10 | ABCB5 | ELK1 | COX19 |
